# Supplementary material for: Common Visual Preference for Curved Contours in Humans and Great Apes
Source: PubMed Central journal article supplement (PMC4641621; doi:10.1371/journal.pone.0141106), 2015-11-11
Supplement: pone.0141106.s002.pdf [file pone.0141106.s002.pdf]

# Tables

**Table 1.** Great apes' choices when stimuli pairs were presented for 84 ms.

|             | Name      | Choice of curved | Choice of right | Consistency |
|-------------|-----------|------------------|-----------------|-------------|
| Chimpanzees | Trudi     | 46.4 n.s.        | 71.3            | 41.4        |
|             | Jahaga    | 48.1 n.s.        | 69.4            | 41.1        |
|             | Fifi      | 50.3 n.s.        | 10.4            | 19.7        |
|             | Alex      | 51.4 n.s.        | 30.7            | 41.4        |
|             | Lome      | 49.2 n.s.        | 72.8            | 35.6        |
|             | Kofi      | 51.9 n.s.        | 42.1            | 46.1        |
|             | Lobo      | 53.1 n.s.        | 48.2            | 45.3        |
| Gorillas    | Kibara    | 53.9 *           | 50.4            | 47.5        |
|             | Viringika | 50.3 n.s.        | 36.2            | 44.2        |
|             | Total     | 50.5             | 47.9            | 40.2        |

Percentages of choices for the curved object, for the object on the right, and the consistency between both blocks.

Binomial test, n.s.: non significant, \* < .05.

**Table 2.** Great apes' choices when stimuli pairs were presented until response.

|             | Name      | Choice of curved | Choice of right | Consistency |
|-------------|-----------|------------------|-----------------|-------------|
| Chimpanzees | Trudi     | 49.7 n.s.        | 35.1            | 48.3        |
|             | Jahaga    | 52.2 n.s.        | 68.6            | 42.2        |
|             | Fifi      | 51.9 n.s.        | 66.8            | 46.1        |
|             | Alex      | 54.2 *           | 55.1            | 37.2        |
|             | Lome      | 50.8 n.s.        | 19.9            | 37.2        |
|             | Kofi      | 55.4 *           | 35.3            | 48.9        |
|             | Lobo      | 56.1 *           | 56.2            | 51.1        |
| Gorillas    | Kibara    | 58.9 *           | 29.2            | 42.2        |
|             | Viringika | 50.0 n.s.        | 39.9            | 51.1        |
|             | Total     | 53.3             | 45.1            | 44.9        |

Percentage of choices for the curved object, for the object on the right, and the consistency between both blocks.

Binomial test, n.s.: non significant, \* < .05.

**EXPERIMENT 4: Linear mixed effects model to analyze whether apes' choice was influenced by multiple test sessions.**

- Were apes' choices influenced by the fact that they were required to perform 5 test sessions? In order to answer this question we used linear mixed effects modeling to determine whether apes' choice of curved versions in test session 1 differed from chance levels, and whether this pattern changed over the course of the subsequent 4 test sessions.

Analysis design:

- The factor Session was dummy coded, and Session 1 was used as reference level
- The factor Session was included to test whether this prediction varied from session 1 to each of the other sessions.
- To tell us about the variability among apes and among stimuli, the model took into account simultaneous within- and between- subject effects.

Results:

- In session 1 (reference level) apes chose the curved-contour version of the stimuli significantly above chance, specifically on 57.1% of the trials ( $t = 2.208, p = .027, 95\% \text{ CI: } 50.8 - 63.1\%$ )
- Differences between the proportion of apes' curved-contour choices did not differ significantly among the 5 sessions (all  $ps > .13$ )
- Likelihood ratio tests revealed that these results were highly consistent among the apes ( $\chi^2(14) = 9.636; p = .788$ ).

**EXPERIMENT 4: Linear mixed effects model to analyze whether the random rewarded choice regime in the Block 1 influenced apes' their choice in the Block 2.**

- Did rewards administered to apes during Block 1 influence their choices during Block 2? In order to answer this question we tested whether apes' choices in Block 2 could be predicted by the interaction between choices in Block 1 and whether these choices had been followed by a reward.

Analysis design:

- If the rewards administered in Block 1 impacted choices in Block 2 we would expect a significant interaction between the response in Block 1 and Rewards in Block 1 in predicting choice in Block 2.
- The factor Session was included to test whether this prediction varied from session to session.
- To tell us about the variability among apes and among stimuli in the predictive strength, the model took into account simultaneous within- and between- subject effects.

Results:

- The three-way interaction (Choice in Block 1  $\times$  Reward  $\times$  Session) was not significant (for all contrasts,  $ps > .37$ ), and neither was the two-way interaction Choice in Block 1  $\times$  Reward ( $\beta = -0.09694$ ;  $z = -0.472$ ;  $p = .637$ ). Thus, apes'

choices in Block 2 for any given pair were unrelated to whether their choices for that pair in Block 1 had been followed by a reward or not, and this did not change from session to session.

- Likelihood ratio tests revealed that this result was highly consistent among the apes ( $\chi^2(9) = 7.100; p = .627$ ).
